# Supplementary material for: In Vitro Digestion and Fecal Fermentation of Peach Gum Polysaccharides with Different Molecular Weights and Their Impacts on Gut Microbiota
Source: MDPI journal article supplement (doi:10.3390/foods11243970), 2022-12-08
Supplement: s1 [file s1]

## Figure supplementary S1

### 1. Preparation of DPG2

The Fenton-Cu<sup>2+</sup> system was used to degrade peach gum to prepare medium-molecular peach gum polysaccharides. A suitable amount of AEPG2 was weighed and dissolved in distilled water to form a 0.5% (w/v) solution, 0.5 mmol/L Cu(Ac)<sub>2</sub> was added, the pH was adjusted to 6.0, and 0.5% H<sub>2</sub>O<sub>2</sub> was added at 25 °C for 30 min, then 0.6% NaHSO<sub>3</sub> was added immediately to terminate the reaction. Then the reaction solution was dialyzed (MWCO 8-14 kDa), concentrated, alcoholic precipitated and lyophilized to obtain degraded peach gum polysaccharides named DPG (73.61%). A QFF ion exchange column was used to elute 10 mg/mL of DPG with a gradient of 0, 0.1, 0.2, 0.3, 0.5 and 2.0 M NaCl at a flow rate of 1.0 mL/min, and an automatic collector was used to collect 6 mL per tube. The distribution of the polysaccharide fractions was detected by the phenol-sulfuric acid method.

### 2. Isolation of peach gum polysaccharides

As shown in Figure supplementary S1A, A QFF ion exchange column was used to separate two fractions, DPG2 and DPG3, with yields of 80.24% and 19.76%, respectively. The highest yielding fraction, DPG2, was used for purity determination and only one symmetric peak was found in the chromatogram (Figure supplementary S1B), indicating that DPG2 was a homogeneous fraction.

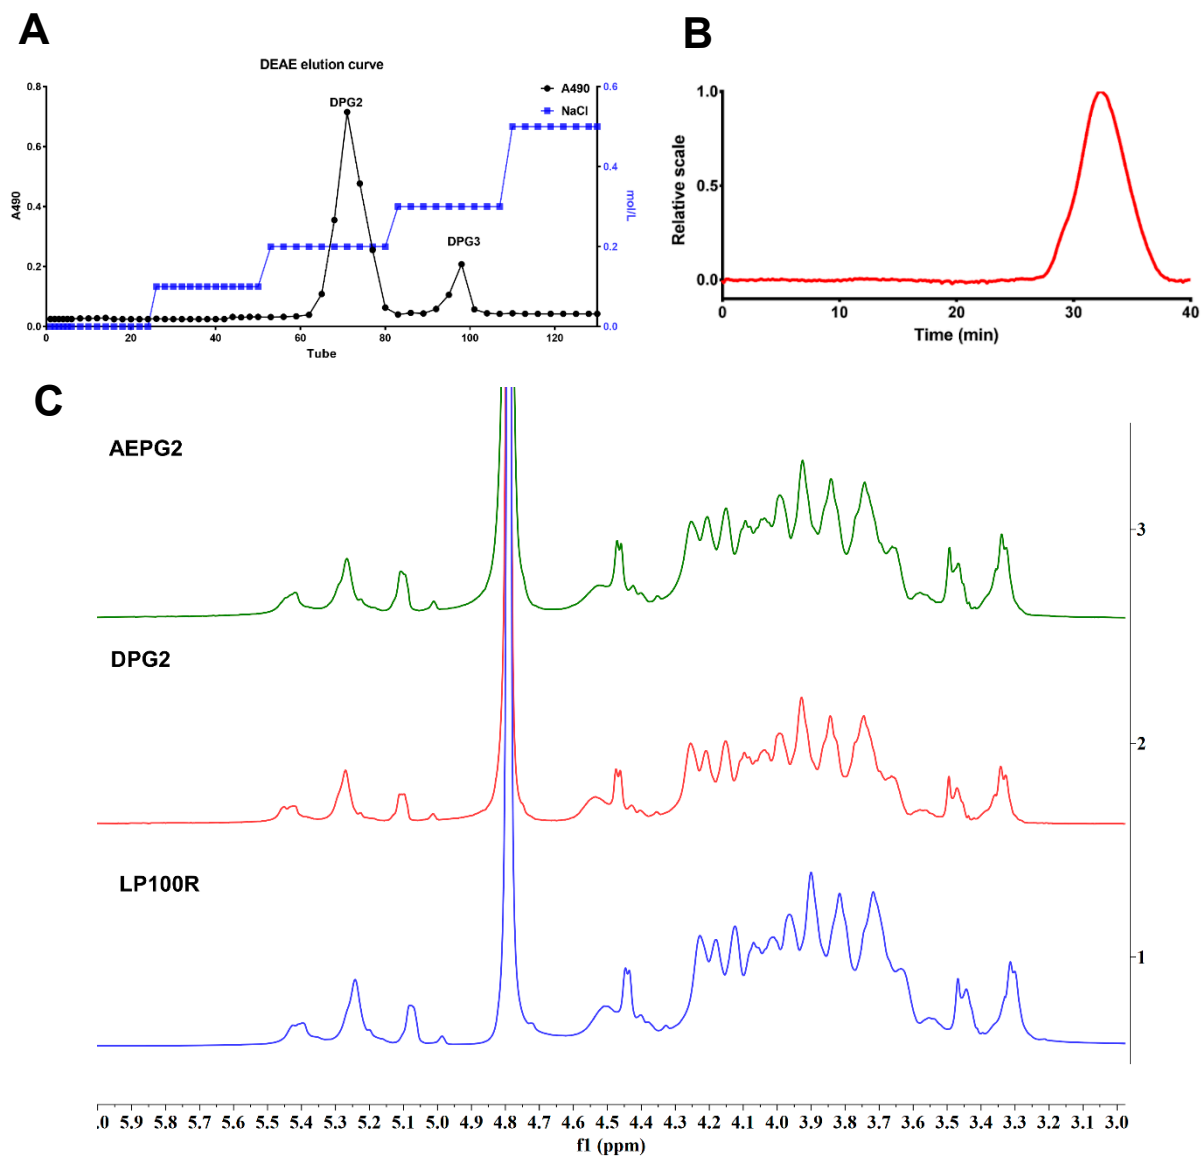

**Figure supplementary S1.** (A) Elution curves of DPG from peach gum on Q-Sepharose Fast Flow column, (B) The chromatography profile of DPG2 fraction on SB-806 and SB-804 HR column. (C)  $^1\text{H}$  NMR spectra of AEFG2, DPG2 and LP100R. AEFG2, alkali (2 M NaOH) extracted PGPs; DPG2, degraded PGPs from AEFG2; LP100R, low molecular weight PGPs degraded from AEFG2, and fractionated by using 100 kDa ultrafiltration membrane.

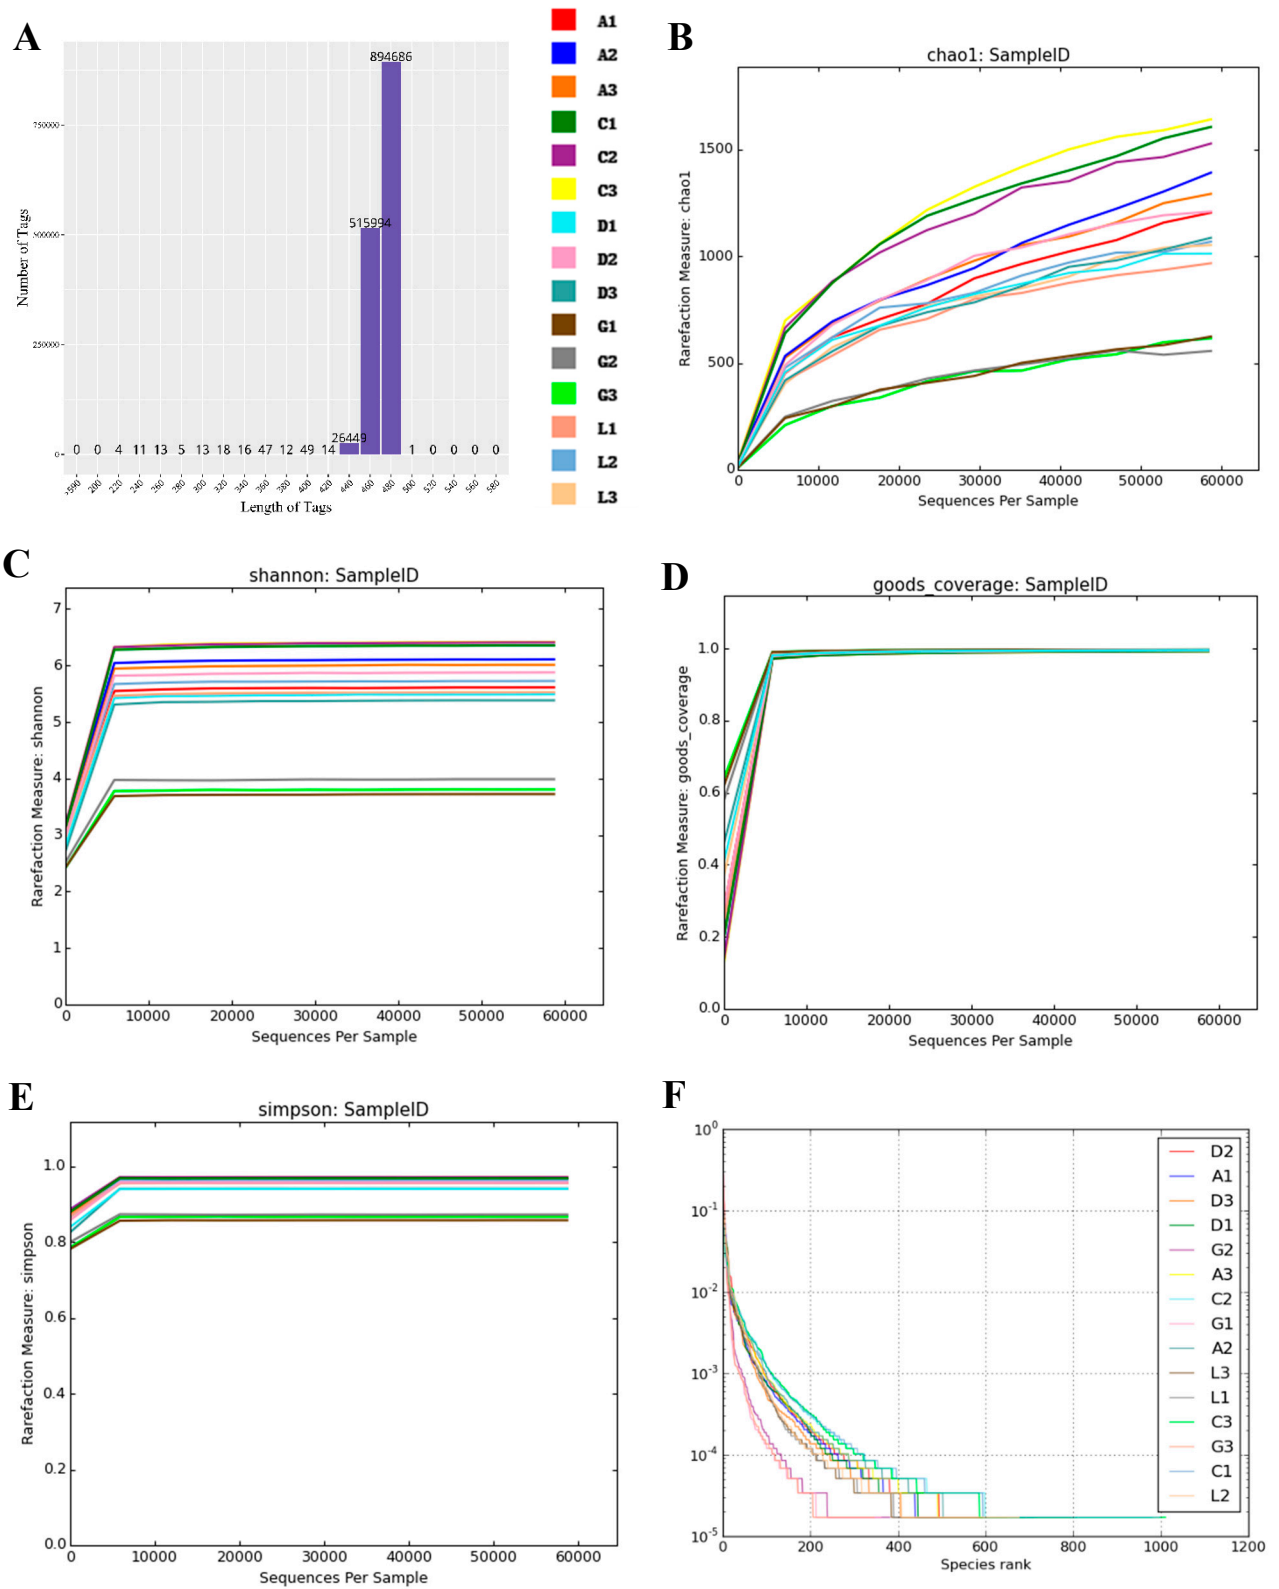

**Figure supplementary S2.** Alpha diversity analysis of gut microbiota. Tags length distribution map (A), Rarefaction Curve (B), Shannon index curve (C), Good coverage curve (D), Simpson index curve (E), Rank abundance curve (F). A: AEPG2, C: Blank, D: DPG2, G: GOS, L: LP100R.

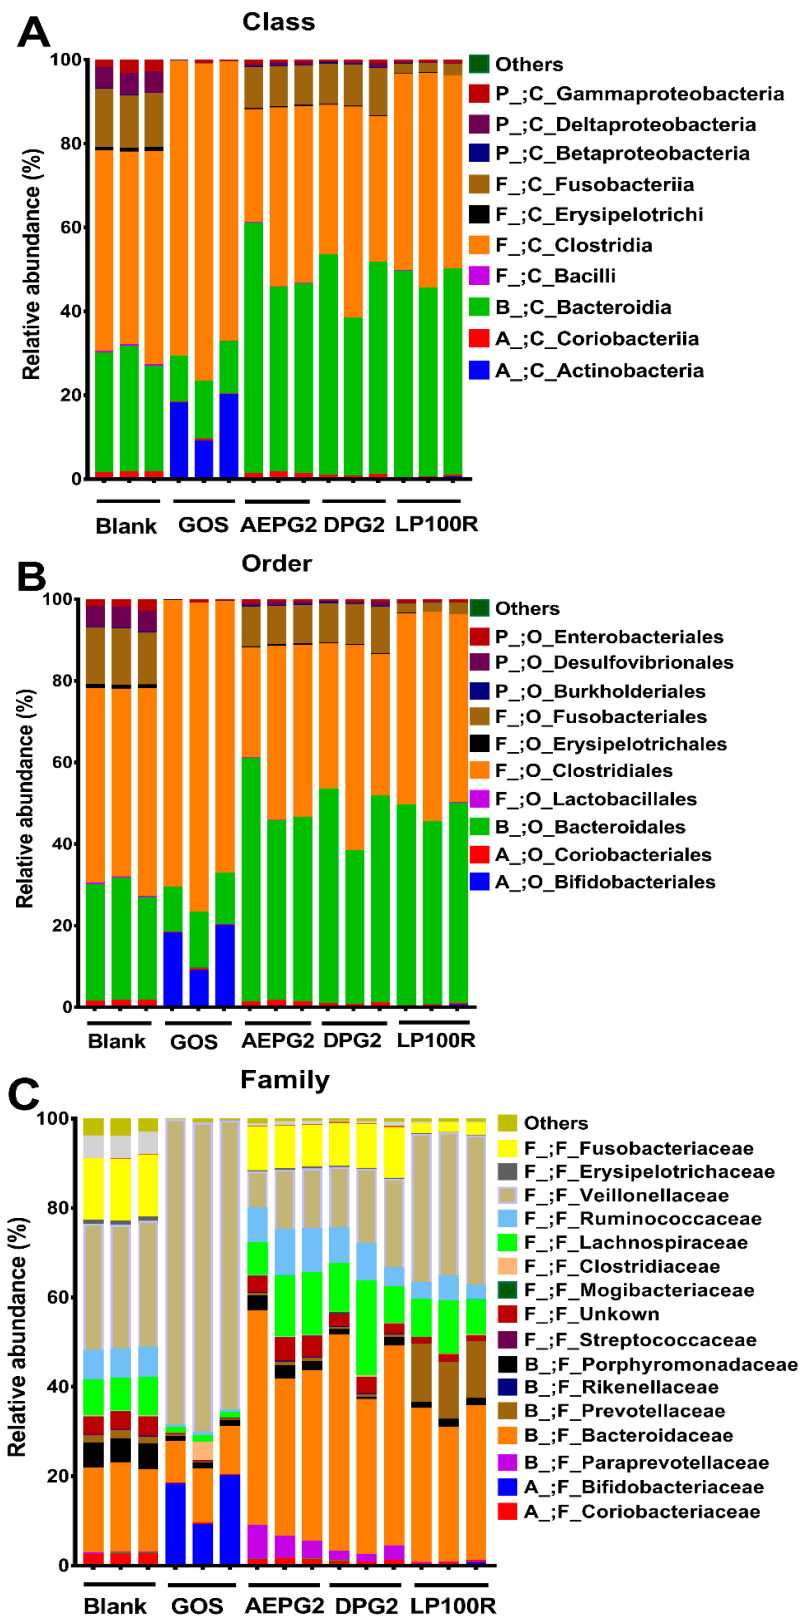

Figure supplementary S3. Gut microbial composition at (A) Class level, (B) Order level and (C) Family level.

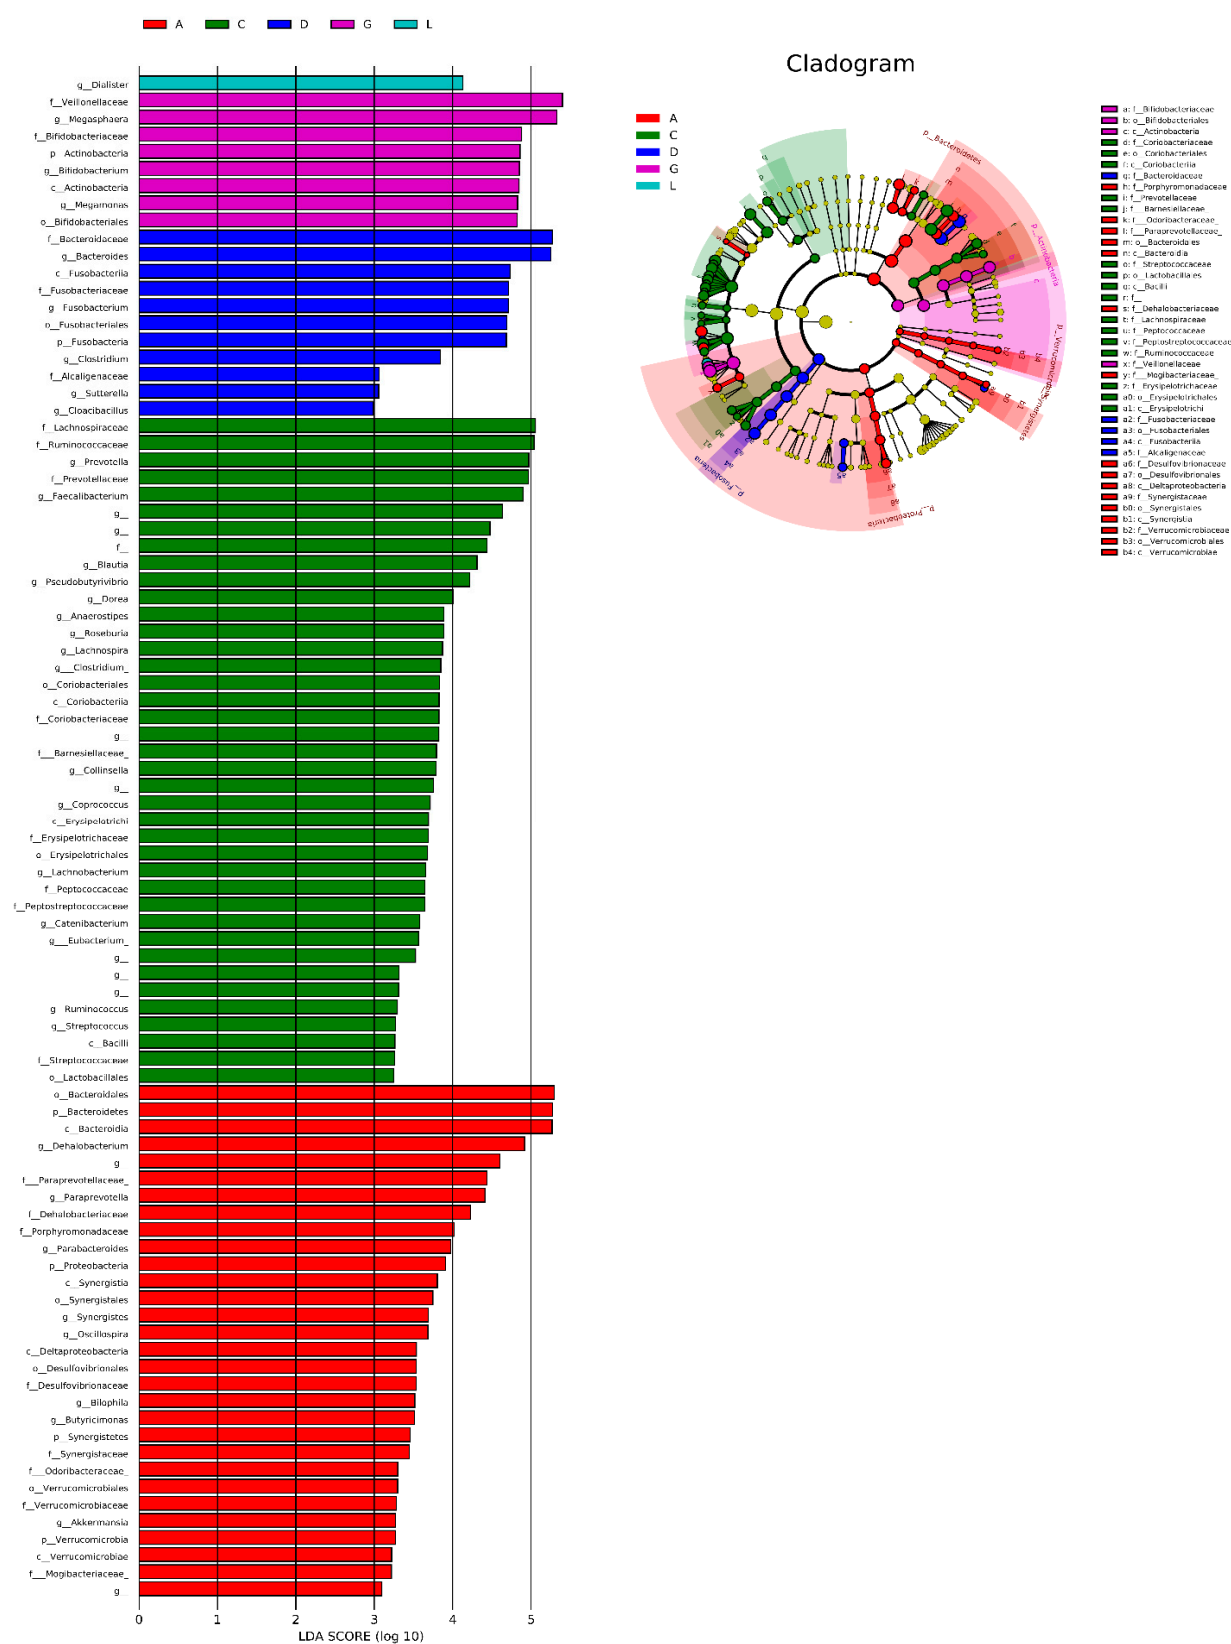

**Figure supplementary S4. LEfse and LDA analysis of microbiota.** A: AEFG2, C: Blank, D: DPG2, G: GOS, L: LP100R.

**Table supplementary S1.** Preparation of stock solutions of simulated digestion fluids.

| Constituent                                       | Stock concentration |       | SSF              |                   | SGF              |                   | SIF              |                   |
|---------------------------------------------------|---------------------|-------|------------------|-------------------|------------------|-------------------|------------------|-------------------|
|                                                   |                     |       | pH 7             |                   | pH 3             |                   | pH 7             |                   |
|                                                   |                     |       | Vol. of<br>stock | SSF concentration | Vol. of<br>stock | SGF concentration | Vol. of<br>stock | SIF concentration |
|                                                   | g/L                 | mol/L | mL               | mmol/L            | mL               | mmol/L            | mL               | mmol/L            |
| KCl                                               | 37.3                | 0.5   | 15.1             | 15.1              | 6.9              | 6.9               | 6.8              | 6.8               |
| KH <sub>2</sub> PO <sub>4</sub>                   | 68                  | 0.5   | 3.7              | 3.7               | 0.9              | 0.9               | 0.8              | 0.8               |
| NaHCO <sub>3</sub>                                | 84                  | 1     | 6.8              | 13.6              | 12.5             | 25                | 42.5             | 85                |
| NaCl                                              | 117                 | 2     | -                | -                 | 11.8             | 47.2              | 9.6              | 38.4              |
| MgCl <sub>2</sub> (H <sub>2</sub> O) <sub>6</sub> | 30.5                | 0.15  | 0.5              | 0.15              | 0.4              | 0.1               | 1.1              | 0.33              |
| (NH <sub>4</sub> ) <sub>2</sub> CO <sub>3</sub>   | 48                  | 0.5   | 0.06             | 0.06              | 0.5              | 0.5               | -                | -                 |
| pH adjustment                                     |                     |       |                  |                   |                  |                   |                  |                   |
|                                                   | mol/L               |       | mL               | mmol/L            | mL               | mmol/L            | mL               | mmol/L            |
| NaOH                                              | 1                   |       | -                | -                 | -                | -                 | -                | -                 |
| HCl                                               | 6                   |       | 0.09             | 1.1               | 1.3              | 15.6              | 0.7              | 8.4               |

SSF, salivary simulating fluid; SGF, gastric simulating fluid; SIF, small intestine simulating fluid.

**Table supplementary S2.** Standard curves.

| Analytes        | Retention time<br>(min) | Standard curves           | Correlation<br>coefficient R <sup>2</sup> |
|-----------------|-------------------------|---------------------------|-------------------------------------------|
| Total sugars    | -                       | $Y = 0.005396X + 0.07689$ | 0.999                                     |
| Reducing sugars | -                       | $Y = 0.374 X + 0.04566$   | 0.999                                     |
| Acetic acid     | 6.701±0.11              | $Y = 18.864x - 10.433$    | 0.999                                     |
| Propionic acid  | 8.276±0.21              | $Y = 38.068x - 15.690$    | 0.999                                     |
| Isobutyric acid | 8.835±0.15              | $Y = 65.690x - 2.330$     | 0.999                                     |
| Butyric acid    | 10.127±0.29             | $Y = 51.019x - 19.798$    | 0.999                                     |
| Isovaleric acid | 11.021±0.21             | $Y = 91.974x - 2.899$     | 0.999                                     |
| Valeric acid    | 12.589±0.30             | $Y = 65.445x - 3.650$     | 0.999                                     |

**Table supplementary S3.** Contents of total sugars in fermentation solutions at different time points of fermentation *in vitro*

| Fermentation<br>time (h) | Total sugars (mg/mL) |             |             |             |             |
|--------------------------|----------------------|-------------|-------------|-------------|-------------|
|                          | Blank                | GOS         | AEPG2       | DPG2        | LP100R      |
| 0                        | 0.36±0.09aB          | 3.69±0.33aA | 3.68±0.40aA | 3.67±0.31aA | 3.68±0.43aA |
| 6                        | 0.26±0.06bE          | 1.29±0.24bD | 3.36±0.31bA | 3.19±0.22bB | 3.04±0.34bC |
| 12                       | 0.23±0.02cE          | 0.69±0.09cD | 3.08±0.31cA | 2.61±0.21cC | 2.78±0.22cB |
| 24                       | 0.23±0.01cE          | 0.63±0.04dD | 2.69±0.25dA | 2.13±0.13dB | 2.04±0.20dC |
| 48                       | 0.19±0.01dD          | 0.61±0.03dB | 0.69±0.08eB | 0.59±0.08eC | 1.88±0.15eA |

AEPG2, alkali (2 M NaOH) extracted PGPs; DPG2, degraded PGPs from AEPG2; LP100R, Low molecular weight PGPs degraded from AEPG2, and fractionated by using 100 kDa ultrafiltration membrane; GOS, galactooligosaccharides, positive control; Blank, ddH<sub>2</sub>O, negative control.

Different lowercase letters indicate significant differences ( $p < 0.05$ ) in the same group among different time points. Different capital letters indicate significant differences ( $p < 0.05$ ) among different groups. n=3.



**Table supplementary S4.** Distributions of PGPs in fermentation broth at different time points of fermentation *in vitro*.

| Samples | Culture | Retention time (min)          | Area ( $\mu\text{V}\cdot\text{sec}$ ) | Area percentage (%)            |
|---------|---------|-------------------------------|---------------------------------------|--------------------------------|
| AEPG2   | 0 h     | 26.76 $\pm$ 0.46 <sup>b</sup> | 3420919 $\pm$ 50636 <sup>a</sup>      | 100.00 $\pm$ 1.33 <sup>a</sup> |
|         | 6 h     | 26.72 $\pm$ 0.39 <sup>b</sup> | 3395489 $\pm$ 99325 <sup>a</sup>      | 99.26 $\pm$ 2.90 <sup>a</sup>  |
|         | 12 h    | 27.00 $\pm$ 0.23 <sup>b</sup> | 3092137 $\pm$ 64887 <sup>b</sup>      | 90.39 $\pm$ 1.82 <sup>b</sup>  |
|         | 24 h    | 28.65 $\pm$ 0.04 <sup>a</sup> | 2605308 $\pm$ 48324 <sup>c</sup>      | 76.16 $\pm$ 1.41 <sup>c</sup>  |
|         | 48 h    | ND                            | 0 $\pm$ 0.0 <sup>d</sup>              | 0 $\pm$ 0.0 <sup>d</sup>       |
| DPG2    | 0 h     | 32.68 $\pm$ 0.02 <sup>b</sup> | 3827056 $\pm$ 64205 <sup>a</sup>      | 100.00 $\pm$ 1.68 <sup>a</sup> |
|         | 6 h     | 32.72 $\pm$ 0.04 <sup>b</sup> | 3436433 $\pm$ 42564 <sup>b</sup>      | 89.79 $\pm$ 1.11 <sup>b</sup>  |
|         | 12 h    | 32.80 $\pm$ 0.03 <sup>b</sup> | 2925753 $\pm$ 33815 <sup>c</sup>      | 76.45 $\pm$ 0.88 <sup>c</sup>  |
|         | 24 h    | 34.39 $\pm$ 0.67 <sup>a</sup> | 1278411 $\pm$ 60682 <sup>d</sup>      | 33.40 $\pm$ 1.79 <sup>d</sup>  |
|         | 48 h    | ND                            | 0 $\pm$ 0.0 <sup>e</sup>              | 0 $\pm$ 0.0 <sup>e</sup>       |
| LP100R  | 0 h     | 36.85 $\pm$ 0.07 <sup>b</sup> | 3581444 $\pm$ 51915 <sup>a</sup>      | 100.00 $\pm$ 1.45 <sup>a</sup> |
|         | 6 h     | 37.02 $\pm$ 0.02 <sup>a</sup> | 3144460 $\pm$ 48788 <sup>b</sup>      | 87.80 $\pm$ 1.36 <sup>b</sup>  |
|         | 12 h    | 37.18 $\pm$ 0.01 <sup>a</sup> | 2663212 $\pm$ 66329 <sup>c</sup>      | 74.36 $\pm$ 1.85 <sup>c</sup>  |
|         | 24 h    | 37.30 $\pm$ 0.01 <sup>a</sup> | 2013305 $\pm$ 14736 <sup>d</sup>      | 56.21 $\pm$ 0.41 <sup>d</sup>  |
|         | 48 h    | 37.74 $\pm$ 0.01 <sup>a</sup> | 1215740 $\pm$ 96691 <sup>e</sup>      | 33.95 $\pm$ 2.70 <sup>e</sup>  |

ND is not detected. Different lowercase letters indicate significant differences ( $p < 0.05$ ) in the same column among different time points. n=3.

**Table supplementary S5.** Monosaccharides peak areas of PGPs at different time points of fermentation *in vitro*.

| Samples        | Culture | AEPG2                                   |                                | DPG2                                    |                                | LP100R                                  |                                |
|----------------|---------|-----------------------------------------|--------------------------------|-----------------------------------------|--------------------------------|-----------------------------------------|--------------------------------|
| Monosaccharide | e       | Area ( $\mu\text{v} \cdot \text{sec}$ ) | percentage (%)                 | Area ( $\mu\text{v} \cdot \text{sec}$ ) | percentage (%)                 | Area ( $\mu\text{v} \cdot \text{sec}$ ) | percentage (%)                 |
| Gal            | 0 h     | 8847944 $\pm$ 64553 <sup>a</sup>        | 100.00 $\pm$ 1.94 <sup>a</sup> | 10551747 $\pm$ 254563 <sup>a</sup>      | 100.00 $\pm$ 7.64 <sup>a</sup> | 8531720 $\pm$ 52248 <sup>a</sup>        | 100.00 $\pm$ 4.57 <sup>a</sup> |
|                | 24 h    | 8754169 $\pm$ 96542 <sup>a</sup>        | 98.94 $\pm$ 2.90 <sup>a</sup>  | 6570715 $\pm$ 94553 <sup>b</sup>        | 62.27 $\pm$ 2.84 <sup>b</sup>  | 8226495 $\pm$ 40652 <sup>b</sup>        | 96.42 $\pm$ 3.21 <sup>b</sup>  |
|                | 48 h    | 1652167 $\pm$ 64223 <sup>b</sup>        | 18.67 $\pm$ 1.93 <sup>b</sup>  | 1307335 $\pm$ 65952 <sup>c</sup>        | 12.39 $\pm$ 1.98 <sup>c</sup>  | 5541767 $\pm$ 35614 <sup>c</sup>        | 64.95 $\pm$ 2.57 <sup>c</sup>  |
| Xyl            | 0 h     | 1450918 $\pm$ 15001 <sup>a</sup>        | 100.00 $\pm$ 2.85 <sup>a</sup> | 1954923 $\pm$ 135422 <sup>a</sup>       | 100.00 $\pm$ 4.06 <sup>a</sup> | 1187752 $\pm$ 39635 <sup>a</sup>        | 100.00 $\pm$ 2.99 <sup>a</sup> |
|                | 24 h    | 1142279 $\pm$ 17965 <sup>b</sup>        | 78.73 $\pm$ 2.94 <sup>b</sup>  | 777511 $\pm$ 54663 <sup>b</sup>         | 39.77 $\pm$ 1.64 <sup>b</sup>  | 940190 $\pm$ 5928 <sup>b</sup>          | 79.16 $\pm$ 1.98 <sup>b</sup>  |
|                | 48 h    | 56436 $\pm$ 846 <sup>c</sup>            | 3.89 $\pm$ 0.36 <sup>c</sup>   | 54927 $\pm$ 10667 <sup>c</sup>          | 2.81 $\pm$ 0.32 <sup>c</sup>   | 385970 $\pm$ 4981 <sup>c</sup>          | 32.50 $\pm$ 1.65 <sup>c</sup>  |
| Ara            | 0 h     | 13545919 $\pm$ 151861 <sup>a</sup>      | 100.00 $\pm$ 4.56 <sup>a</sup> | 15775482 $\pm$ 148452 <sup>a</sup>      | 100.00 $\pm$ 4.45 <sup>a</sup> | 12056894 $\pm$ 245378 <sup>a</sup>      | 100.00 $\pm$ 7.36 <sup>a</sup> |
|                | 24 h    | 11774266 $\pm$ 136453 <sup>b</sup>      | 86.92 $\pm$ 4.09 <sup>b</sup>  | 7300393 $\pm$ 40535 <sup>b</sup>        | 46.28 $\pm$ 3.14 <sup>b</sup>  | 6917468 $\pm$ 87443 <sup>b</sup>        | 57.37 $\pm$ 2.62 <sup>b</sup>  |
|                | 48 h    | 1109256 $\pm$ 85562 <sup>c</sup>        | 8.19 $\pm$ 2.57 <sup>c</sup>   | 594619 $\pm$ 4391 <sup>c</sup>          | 3.77 $\pm$ 1.33 <sup>c</sup>   | 3923798 $\pm$ 53417 <sup>c</sup>        | 32.54 $\pm$ 1.64 <sup>c</sup>  |

Different lowercase letters indicate significant differences ( $p < 0.05$ ) in the same group among different time points. n=3.

**Table supplementary S6.** Concentrations of SCFAs in fermentation broths at different time points of fermentation *in vitro*.

| SCFAs (mM)             | Sample | Anaerobic fermentation time (h) |                          |                          |                          |                          |
|------------------------|--------|---------------------------------|--------------------------|--------------------------|--------------------------|--------------------------|
|                        |        | 0                               | 6                        | 12                       | 24                       | 48                       |
| Acetic acid            | Blank  | 4.51±0.21 <sup>bD</sup>         | 5.80±0.24 <sup>cC</sup>  | 6.52±0.03 <sup>cB</sup>  | 6.83±0.15 <sup>eA</sup>  | 6.80±0.30 <sup>dA</sup>  |
|                        | GOS    | 4.65±0.20 <sup>bD</sup>         | 14.16±1.18 <sup>aC</sup> | 18.16±0.44 <sup>aB</sup> | 19.42±0.51 <sup>bB</sup> | 22.50±0.50 <sup>bA</sup> |
|                        | AEPG2  | 4.84±0.04 <sup>aE</sup>         | 5.15±0.10 <sup>dD</sup>  | 5.63±0.07 <sup>eC</sup>  | 17.59±1.81 <sup>cB</sup> | 28.69±0.30 <sup>aA</sup> |
|                        | DPG2   | 4.78±0.10 <sup>aE</sup>         | 5.73±0.19 <sup>cD</sup>  | 6.05±0.15 <sup>dC</sup>  | 22.71±0.63 <sup>aB</sup> | 28.55±1.47 <sup>aA</sup> |
|                        | LP100R | 4.61±0.08 <sup>bE</sup>         | 8.56±0.32 <sup>bD</sup>  | 11.20±0.45 <sup>bC</sup> | 14.86±0.65 <sup>dB</sup> | 17.61±0.85 <sup>cA</sup> |
| Propionic acid         | Blank  | 1.58±0.05 <sup>aC</sup>         | 2.17±0.07 <sup>cB</sup>  | 2.37±0.04 <sup>cA</sup>  | 2.09±0.10 <sup>eB</sup>  | 2.15±0.16 <sup>eB</sup>  |
|                        | GOS    | 1.47±0.07 <sup>cE</sup>         | 5.34±0.33 <sup>aD</sup>  | 7.91±0.17 <sup>aB</sup>  | 8.20±0.21 <sup>cA</sup>  | 7.04±0.23 <sup>dC</sup>  |
|                        | AEPG2  | 1.43±0.05 <sup>cD</sup>         | 1.81±0.11 <sup>dC</sup>  | 1.92±0.04 <sup>eC</sup>  | 8.60±1.35 <sup>bB</sup>  | 12.05±0.81 <sup>aA</sup> |
|                        | DPG2   | 1.54±0.09 <sup>bD</sup>         | 2.03±0.07 <sup>cC</sup>  | 2.11±0.10 <sup>dC</sup>  | 8.94±0.49 <sup>aB</sup>  | 11.24±0.48 <sup>bA</sup> |
|                        | LP100R | 1.62±0.12 <sup>aE</sup>         | 3.37±0.06 <sup>bD</sup>  | 4.41±0.15 <sup>bC</sup>  | 6.18±0.34 <sup>dB</sup>  | 7.67±0.32 <sup>cA</sup>  |
| <i>i</i> -Butyric acid | Blank  | 0.10±0.01 <sup>aB</sup>         | 0.08±0.01 <sup>bB</sup>  | 0.09±0.01 <sup>cB</sup>  | 0.11±0.01 <sup>dB</sup>  | 0.15±0.01 <sup>dA</sup>  |
|                        | GOS    | 0.10±0.01 <sup>aD</sup>         | 0.13±0.01 <sup>aC</sup>  | 0.21±0.02 <sup>aA</sup>  | 0.16±0.01 <sup>cB</sup>  | 0.13±0.01 <sup>dC</sup>  |
|                        | AEPG2  | 0.10±0.01 <sup>aC</sup>         | 0.08±0.01 <sup>bC</sup>  | 0.09±0.01 <sup>cC</sup>  | 1.02±0.13 <sup>aB</sup>  | 1.13±0.09 <sup>aA</sup>  |
|                        | DPG2   | 0.07±0.01 <sup>bD</sup>         | 0.08±0.01 <sup>bD</sup>  | 0.11±0.01 <sup>bC</sup>  | 0.67±0.09 <sup>bB</sup>  | 0.85±0.04 <sup>bA</sup>  |
|                        | LP100R | 0.08±0.01 <sup>bD</sup>         | 0.09±0.01 <sup>bD</sup>  | 0.12±0.01 <sup>bC</sup>  | 0.16±0.01 <sup>cB</sup>  | 0.43±0.05 <sup>cA</sup>  |
| <i>n</i> -Butyric acid | Blank  | 1.16±0.02 <sup>aC</sup>         | 1.57±0.08 <sup>cA</sup>  | 1.27±0.06 <sup>eB</sup>  | 1.26±0.04 <sup>eB</sup>  | 1.27±0.05 <sup>eB</sup>  |
|                        | GOS    | 1.10±0.01 <sup>bC</sup>         | 2.78±0.12 <sup>aB</sup>  | 2.93±0.02 <sup>aA</sup>  | 2.77±0.11 <sup>dB</sup>  | 2.76±0.05 <sup>dB</sup>  |
|                        | AEPG2  | 1.07±0.01 <sup>cE</sup>         | 1.18±0.11 <sup>eD</sup>  | 1.38±0.08 <sup>dC</sup>  | 5.54±0.66 <sup>aB</sup>  | 7.98±0.16 <sup>aA</sup>  |
|                        | DPG2   | 1.04±0.03 <sup>cE</sup>         | 1.45±0.03 <sup>dD</sup>  | 1.59±0.08 <sup>cC</sup>  | 5.40±0.31 <sup>bB</sup>  | 7.05±0.30 <sup>bA</sup>  |
|                        | LP100R | 1.04±0.03 <sup>cE</sup>         | 2.00±0.17 <sup>bD</sup>  | 2.77±0.16 <sup>bC</sup>  | 3.41±0.09 <sup>cB</sup>  | 4.24±0.19 <sup>cA</sup>  |
| <i>i</i> -Valeric acid | Blank  | 0.15±0.01 <sup>aC</sup>         | 0.15±0.01 <sup>cC</sup>  | 0.18±0.03 <sup>dB</sup>  | 0.23±0.03 <sup>eA</sup>  | 0.25±0.01 <sup>eA</sup>  |
|                        | GOS    | 0.15±0.01 <sup>aC</sup>         | 0.46±0.02 <sup>aA</sup>  | 0.36±0.02 <sup>aB</sup>  | 0.32±0.03 <sup>dB</sup>  | 0.32±0.03 <sup>dB</sup>  |
|                        | AEPG2  | 0.16±0.01 <sup>aC</sup>         | 0.12±0.01 <sup>dC</sup>  | 0.23±0.03 <sup>cB</sup>  | 1.53±0.17 <sup>aA</sup>  | 1.51±0.08 <sup>aA</sup>  |
|                        | DPG2   | 0.16±0.01 <sup>aD</sup>         | 0.19±0.10 <sup>bC</sup>  | 0.20±0.02 <sup>cC</sup>  | 1.07±0.10 <sup>bB</sup>  | 1.23±0.08 <sup>bA</sup>  |
|                        | LP100R | 0.15±0.01 <sup>aD</sup>         | 0.18±0.02 <sup>bD</sup>  | 0.27±0.03 <sup>bC</sup>  | 0.41±0.03 <sup>cB</sup>  | 0.85±0.07 <sup>cA</sup>  |
| <i>n</i> -Valeric acid | Blank  | 0.23±0.02 <sup>bB</sup>         | 0.14±0.01 <sup>cD</sup>  | 0.28±0.02 <sup>bA</sup>  | 0.26±0.02 <sup>cA</sup>  | 0.18±0.02 <sup>dC</sup>  |
|                        | GOS    | 0.25±0.02 <sup>aD</sup>         | 0.59±0.01 <sup>aB</sup>  | 0.47±0.05 <sup>aC</sup>  | 0.48±0.04 <sup>bC</sup>  | 0.92±0.08 <sup>aA</sup>  |
|                        | AEPG2  | 0.22±0.01 <sup>bC</sup>         | 0.17±0.01 <sup>bD</sup>  | 0.17±0.01 <sup>cD</sup>  | 0.52±0.07 <sup>aB</sup>  | 0.86±0.03 <sup>bA</sup>  |
|                        | DPG2   | 0.22±0.01 <sup>bC</sup>         | 0.16±0.01 <sup>bD</sup>  | 0.17±0.01 <sup>cD</sup>  | 0.46±0.06 <sup>bB</sup>  | 0.94±0.10 <sup>aA</sup>  |
|                        | LP100R | 0.21±0.01 <sup>bC</sup>         | 0.17±0.01 <sup>bD</sup>  | 0.19±0.01 <sup>cD</sup>  | 0.28±0.03 <sup>cB</sup>  | 0.70±0.11 <sup>cA</sup>  |
| Total SCFAs            | Blank  | 7.73±0.19 <sup>bD</sup>         | 9.92±0.24 <sup>cC</sup>  | 10.71±0.11 <sup>cB</sup> | 10.79±0.20 <sup>eA</sup> | 10.80±0.30 <sup>eA</sup> |
|                        | GOS    | 7.72±0.11 <sup>bE</sup>         | 23.47±1.58 <sup>aD</sup> | 30.04±0.82 <sup>aC</sup> | 31.34±0.86 <sup>cB</sup> | 33.68±0.47 <sup>cA</sup> |
|                        | AEPG2  | 7.81±0.02 <sup>aE</sup>         | 8.52±0.25 <sup>eD</sup>  | 9.42±0.16 <sup>eC</sup>  | 34.79±4.19 <sup>bB</sup> | 52.23±0.91 <sup>aA</sup> |
|                        | DPG2   | 7.80±0.12 <sup>aE</sup>         | 9.64±0.22 <sup>dD</sup>  | 10.24±0.21 <sup>dC</sup> | 39.25±1.63 <sup>aB</sup> | 49.87±2.30 <sup>bA</sup> |
|                        | LP100R | 7.72±0.14 <sup>bE</sup>         | 14.36±0.44 <sup>bD</sup> | 18.95±0.70 <sup>bC</sup> | 25.30±1.03 <sup>dB</sup> | 31.50±1.07 <sup>dA</sup> |

Different lowercase letters indicate significant differences ( $p < 0.05$ ) among different groups. Different capital letters indicate significant differences ( $p < 0.05$ ) in the same group among different time points. n=3.
